# Supplementary material for: Functional Validation of Doxorubicin-Induced Cardiotoxicity-Related Genes
Source: PubMed Central journal article supplement — JACC CardioOncol. 2024 Jan 23;6(1):38–50. doi: 10.1016/j.jaccao.2023.11.008 (PMC10950437; doi:10.1016/j.jaccao.2023.11.008), 2024-01-23
Supplement: mmc1.pdf [file mmc1.pdf]

## Supplemental Appendix

### Functional Validation of Doxorubicin-Induced Cardiotoxicity-Related Genes

Fonoudi *et al.*,

#### Supplemental Appendix Index

|                                                                                                                                                        |    |
|--------------------------------------------------------------------------------------------------------------------------------------------------------|----|
| Supplemental Methods.....                                                                                                                              | 2  |
| Supplemental Table 1: Genes and variants associated with DIC. Provided as an .xlsx file.....                                                           | 12 |
| Supplemental Table 2: gRNAs sequences used for CRISPR/Cas9 directed knockout of AIC-related genes.....                                                 | 12 |
| Supplemental Table 3: Potential off targets of each gRNA used for CRISPR/Cas9 directed knockout of AIC-related genes. Provided as an .xlsx file.....   | 15 |
| Supplemental Table 4: Confirmation of the knockout clones in isogenic hiPSC using Sanger sequencing.....                                               | 15 |
| Supplemental Table 5: Sequencing primers used to verify knockouts of AIC-related genes in hiPSCs.....                                                  | 17 |
| Supplemental Table 6: Confirmation of the knockout clones in isogenic hiPSC using Western blotting.....                                                | 19 |
| Supplemental Table 7: List of proteins that western blot did not work on them.....                                                                     | 20 |
| Supplemental Table 8: TaqMan probes used to quantify the mRNA expression of AIC -related genes knockouts.....                                          | 21 |
| Supplemental Table 9: SNPs present in hiPSC line 19-3 that were significant in their original studies and are associated with genes in this study..... | 22 |
| Supplemental Figure 1. Sanger sequencing of knockout lines generated for each studied gene..                                                           | 23 |
| Supplemental Figure 2. Sanger sequencing of knockout lines generated for each studied gene..                                                           | 24 |
| Supplemental Figure 3. Sanger sequencing of knockout lines generated for each studied gene..                                                           | 25 |
| Supplemental Figure 4. Gel electrophoresis of PCR product covering the region after the guide RNA of ABBC5.....                                        | 26 |
| Supplemental Figure 5. Western blot analysis of knock out lines generated for each studied gene.....                                                   | 27 |
| Supplemental Figure 6. Western blot analysis of knock out lines generated for each studied gene.....                                                   | 28 |
| Supplemental Figure 7. Cell viability analysis of different gene knockouts using CellTiter-Glo post 72 h of doxorubicin treatment.....                 | 29 |
| Supplemental Figure 8. Cell viability analysis of different gene knockouts using CellTiter-Glo post 72 h of doxorubicin treatment.....                 | 30 |
| Supplemental Figure 9. Cell viability analysis of different gene knockouts using CellTiter-Glo post 72 h of doxorubicin treatment.....                 | 31 |
| Supplemental Figure 10. Cell viability analysis of different gene knockouts using CellTiter-Glo post 72 h of doxorubicin treatment.....                | 32 |

## Supplemental Methods

**Variant and gene candidates from GWAS and GCAS, expressed in human heart and in hiPSC cells.** We performed a comprehensive PubMed search for both original and review articles investigating genetic risk factors associated with DIC using the following search terms: doxorubicin, anthracycline, single nucleotide polymorphism, cardiotoxicity, chemotherapy, pharmacogenomics, GWAS, candidate gene studies, and gene variants. This search was completed multiple times throughout the study to confirm that all newly identified variants were included, and we terminated the search in November 2020. This search was cross-referenced with several reviews studying AIC<sup>68-72</sup>. The selected candidates were then tested for their expression level in hiPSC-CMs, adult human heart and fetal human heart<sup>73</sup>. The genes with the expression level below 10 TPM in hiPSC-CMs were removed from the study.

**Human induced pluripotent stem cell culture.** The hiPSC line 19c3 was previously derived from peripheral blood mononuclear cells of a healthy male using Sendai virus (Invitrogen) using chemically defined B8 as previously described<sup>74</sup>. Whole genome sequencing of this hiPSC line showed that it contains harbors 18 SNPs that were significant in their original studies and are associated with genes that we have studied here. Seven of these SNPs are in genes that when knocked out did not affect our *in vitro* DIC assay. Of the remaining 11, three were part of the *SLC28A3* conserved locus and there likely to be protective, and 8 were in risk genes **(Supplemental Table 9)**

Protocols were approved by the Northwestern University Institutional Review Board. This hiPSC line was modified to express an exogenous *TNNT2* promoter-driven Zeocin resistance cassette for cardiomyocyte purification. hiPSCs were passaged at a ratio of 1:15 every 4 days using 0.5 mM EDTA for 6 min at RT, achieving 80% confluence. Cells were routinely maintained in a

low-cost variant of B8 medium<sup>74-76</sup> on 1:800 growth factor reduced Matrigel (Corning) diluted in DMEM (Corning), except for the first 24 h after passage when B8 was supplemented with 2  $\mu$ M thiazovivin (LC Labs, T-9753), hereby referred to as B8T medium. All pluripotent and reprogramming cells were maintained at 37 °C in Heracell VIOS 160i humidified incubators (Thermo) with 5% CO<sub>2</sub> and 5% O<sub>2</sub>. All cultures were routinely tested for mycoplasma using a MycoAlert PLUS Kit (Lonza) and a Varioskan LUX (Thermo Scientific) plate reader.

**CRISPR/Cas9 gRNA design.** To generate gene knockouts pairs of CRISPR/Cas9 guide RNAs were designed >50 bp apart to induce a large deletion within the earliest common exon possible of each gene using an online CRISPR design tool (IDT) with high predicted on-target score and minimal predicted off-target effect. DNA oligos (IDT) encoding each gRNA with BbsI ligation overhangs were annealed and inserted into the BbsI restriction site of a pSpCas9(BB)-2A-Puro (PX459, Addgene 62988) plasmid. The constructed gRNA expression plasmids were confirmed by Sanger sequencing (Eurofins) with the LKO1\_5\_primer (5'-GACTATCATATGCTTACCG-3'). **Supplemental Table 2-4** include all used primers for sgRNA expression vector generation, list of potential off targets and sequencing primers.

**CRISPR/Cas9-mediated knockout of candidate genes.** hiPSCs were cultured in B8 medium to ~80% confluence. Cells were harvested using 0.5 mM TrypLE for 6 min at RT and resuspended in B8T medium,  $5 \times 10^6$  19c3 cells were electroporated with 5  $\mu$ g of each gRNA expression vector using an Invitrogen Neon. Cells were maintained for 48 h in B8T medium supplemented with 0.5  $\mu$ g/mL of puromycin (Gibco). Puromycin resistant individual colonies were picked and expanded ~10 days after electroporation. Genomic DNA was extracted from the cell pellets using a Quick-DNA Miniprep Plus kit (Zymo). Clones with indels were identified by Sanger sequencing (Eurofins) with primers outside of the targeting region. Indels were detected

using an online tool (<https://benchling.com>). For ABCC5-KO, which Sanger sequencing was not possible, knockout was validated using a PCR showing the lack of band in the knockout hiPSC line. A complete list of primers used for sequencing is listed in **Supplemental Table 5**.

**Quantitative Real-time PCR to assess the expression of knocked out genes.** RNA was isolated using TRI reagent (Zymo) and Direct-zol RNA microprep kit (Zymo) including on-column DNase digestion to remove genomic DNA. cDNA was produced from 2 µg of total RNA using a High Capacity RNA-to-cDNA kit (Applied Biosystems). All PCR reactions were performed in triplicate in a 384-well plate format using TaqMan Gene Expression Master Mix in a QuantStudio 5 Real-Time PCR System (both Applied Biosystems). A list of all probes used is included in **Supplemental Table 5**. Relative quantification of gene expression was calculated using  $2^{-\Delta\Delta C_t}$  method, normalized to the reference 18S, *ACTB*, or *GAPDH* and untreated control samples as specified in the figure legends.

**Cardiac differentiation.** Differentiation into cardiomyocytes was performed according to previously described RBAI protocol with slight modifications<sup>77,78</sup>. Briefly, hiPSCs were split at a 1:15 ratio using 0.5 mM EDTA and grown in B8 medium for 4 days reaching ~75% confluence. At the start of differentiation (day 0), B8 medium was changed to R6C, consisting of RPMI 1640 (Corning, 10-040-CM), supplemented with 6 µM of glycogen synthase kinase 3-b inhibitor CHIR99021 (LC Labs, C-6556). On day 1, medium was changed to RPMI 1640 basal medium alone, and on day 2 medium was changed to RBA-C59, consisting of RPMI 1640 supplemented with 2 mg/mL fatty acid-free bovine serum albumin (GenDEPOT, A0100), 200 µg/mL L-ascorbic acid 2-phosphate (Wako, 321-44823) and 0.5 µM Wnt-C59 (Biorbyt, orb181132). Medium was then changed on day 4 and then every other day with RBAI consisting of RPMI 1640 supplemented with 500 µg/mL fatty acid-free bovine serum albumin, 200 µg/mL L-ascorbic acid 2-phosphate,

and 1  $\mu\text{g}/\text{mL}$  *E. coli*-derived recombinant human insulin (Gibco, A11382IJ). Contracting cells were observed from day 7 and were treated with 25  $\mu\text{g}/\text{mL}$  of Zeocin from day 10 to day 14 to purify cardiomyocytes. On day 20 of differentiation, cardiomyocytes were dissociated using DPBS for 20 min at 37 °C followed by 1:200 Liberase TH (Roche, 5401151001) diluted in DPBS for 20 min at 37 °C, centrifuged at  $300 \times g$  for 5 min, and filtered through a 100  $\mu\text{m}$  cell strainer (Falcon). Cells were then plated in RBAI+10% Cosmic Calf Serum (Hyclone) for 2 days on 1:800 Matrigel-coated plates for each assay, media was then switched back to RBAI which was changed every 2-3 days and cells were assayed on d30. During differentiation cells were maintained at 5%  $\text{CO}_2$  and atmospheric  $\text{O}_2$ .

**Doxorubicin treatment.** Doxorubicin hydrochloride (HY-15142, MedChem Express) was resuspended to 10 mM in cell culture-grade water (Corning) and aliquots were stored at -20 °C. Day 30 hiPSC-CMs were treated for 24 h or 72 h with doxorubicin (0.01-100  $\mu\text{M}$ ) diluted in RPMI 1640 medium (no phenol red, Corning) supplemented with 500  $\mu\text{g}/\text{mL}$  recombinant human serum albumin (Oryzogen).

**384-well plate-based cell viability and reactive oxygen species (ROS) assays.** hiPSC-CMs were plated at 25K cells per well in 384-well microplates (Greiner, 781098). To measure cell viability after 72 h of doxorubicin (0.01-100  $\mu\text{M}$ ) treatment, CellTiter-Glo 2.0 (Promega) was used per manufacturer's instructions. Luminescence was measured using a VarioSkan Lux Multi-Mode Reader (Thermo Scientific) with an integration time of 0.25 sec. 10  $\mu\text{M}$  staurosporine (MedChemExpress) was used as a positive control. To measure ROS after 24 h of doxorubicin (0.01-100  $\mu\text{M}$ ) treatment, ROS-Glo  $\text{H}_2\text{O}_2$  (Promega) was used according to manufacturer's instructions. 50  $\mu\text{M}$  menadione (MedChemExpress) was used as a positive control. Data were analyzed using Prism 9.0 software (GraphPad) using standard dose-response guidelines.

**Western Blotting.** Cell lysates (25  $\mu$ g) were denatured with NuPAGE LDS sample buffer (Invitrogen) containing NuPAGE sample reducing agent (Invitrogen) and protease inhibitor cocktail (Thermo Scientific) and boiled at 70 °C for 10 min. Proteins were separated by gel electrophoresis using NuPAGE Novex 4-12% Bis-Tris precast gels (Invitrogen) and transferred onto nitrocellulose membranes using the iBlot Gel Transfer Device (Invitrogen). Membranes were blocked with 1% non-fat milk, 0.2% Tween 20, in PBS (Corning) for 30 min at room temperature and then probed with appropriate primary antibodies (**Supplemental Table 6 and 7**) overnight at 4 °C. Next, membranes were incubated with IRDye 800 and IRDye 680-conjugated goat anti-rabbit (1:20,000; LI-COR Biosciences, 926-68071) or goat anti-mouse IgG antibody (1:20,000; LI-COR Biosciences, 926-68070) for 1 h at room temperature. Membranes were imaged with an Odyssey IR Imaging System (LI-COR) and immunoreactive bands were visualized using Fiji (ImageJ) software<sup>79</sup>.  $\beta$ -Tubulin antibodies (50 kDa, 1: 3000, Rabbit LI-COR, 926-42211 Biosciences and Mouse Thermo Scientific, MA5-16308) was used as positive controls in all the blots. The western blot worked for 32/36 tested proteins except for ABCC9, GPX3, ABCC4, and NOS3 despite testing two different antibodies in both hiPSCs and hiPSC-CMs. Out of 32 western blots, the correct band size was detected in all except for PRDM2, ZNF521, and SP4.

**Immunofluorescent staining.** hiPSC-CMs were plated at 50,000 cells per well in 96-well microplates (Greiner Bio, 655209). Cells were fixed with 4% paraformaldehyde (Electron Microscopy Services) in DPBS for 15 min at RT, permeabilized with 1% saponin (Sigma) in DPBS for 15 min at RT, blocked with 3% bovine serum albumin (BSA, Sigma) in DPBS for 30 min at RT, and stained overnight in 3% BSA/1% saponin/DPBS at 4 °C with 1:200 polyclonal rabbit IgG anti-TNNT2 (Abcam, ab45932) and 1:200 monoclonal mouse IgG $\gamma$ H2AX (Sigma, 05-636). Cells were washed and then stained with secondary antibodies 1:1000 Alexa Fluor 594 goat anti-rabbit

IgG and Alexa Fluor 488 goat anti-mouse IgG<sub>1</sub>, (all Invitrogen) in 3% BSA/1% saponin/DPBS for 1 hr at RT in the dark. Cells were washed three times. NucBlue (Invitrogen) was added during the last wash. Slides were imaged with a Ti-E inverted fluorescent microscope (Nikon Instruments) and a Zyla sCMOS camera (Andor) using NIS-Elements 4.4 Advanced software.

**Flow cytometry.** For staining of intracellular markers, day 30 dissociated hiPSC-CMs were fixed with 4% paraformaldehyde (Electron Microscopy Services) in DPBS for 15 min at RT, permeabilized with 1% saponin (Sigma) in DPBS for 15 min at RT, washed with DPBS, and stained for 45 min in 3% BSA/1% saponin/DPBS at RT with 1:500 mouse monoclonal IgG<sub>1</sub> TNNT2-647 (BD Biosciences, 565744) and washed again with DPBS. Isotype controls mouse IgG<sub>1</sub>-647 (BD Biosciences, 565571) was used to establish gating. Human dermal fibroblasts showed no positive staining under these conditions. All cells were analyzed using a CytoFLEX (Beckman Coulter) with CytExpert 2.0 software.

**DNA damage assay.** After 24 h of doxorubicin treatment, hiPSC-CMs were dissociated, processed with BD Cytotfix/Cytoperm fixation/permeabilization kit per manufacturer's instructions, and stained with 1:20 mouse IgG<sub>1</sub>  $\gamma$ H2AX-647 (BD Biosciences, 560447) at 4 °C for 30 min in the dark and washed again with DPBS. Isotype control mouse IgG<sub>1</sub>-647 (BD Biosciences, 565571) was used to establish gating. Cells were analyzed using a CytoFLEX (Beckman Coulter) with CytExpert 2.0 software and Prism 9.0 software (GraphPad).

**Doxorubicin uptake quantification.** hiPSC-CMs were plated on 12-well plates ( $2 \times 10^6$  /well). On day 30, cells were treated for 24 h with doxorubicin or RPMI 1640 medium (no phenol red, Corning) supplemented with 500  $\mu$ g/mL recombinant human serum albumin (Oryzogen) as negative control. Cells were then treated with doxorubicin (1 and 3  $\mu$ M). Cellular autofluorescence was assayed before doxorubicin treatment and serves as baseline fluorescence. Doxorubicin

intrinsic fluorescence-PE was measured 1 h and 3 h post doxorubicin treatment and normalized to baseline fluorescence. All cells were stained with NucRed Live ReadyProbes Reagent (ThermoFisher) to monitor cell viability. Cells were analyzed using a CytoFLEX (Beckman Coulter) with CytExpert 2.0 software and Prism 9.0 software (GraphPad).

**Iron uptake quantification.** On day 30, hiPSC-CMs were treated for 24 h with 100  $\mu$ M of iron sulfate hydrate (CAS 7782-63-0, GTI laboratories) or RPMI 1640 medium (no phenol red, Corning) supplemented with 500  $\mu$ g/mL recombinant human serum albumin (Oryzogen) and transferrin (T3705-1G, Sigma) as negative control. The following day, cells were dissociated using Liberase, and CellTrace calcein red-orange AM (C34851, ThermoFisher) was used according to manufacturer instructions to quantify iron uptake by the cells. All cells were stained with NucBlue Live ReadyProbes Reagent (ThermoFisher) to monitor cell viability. Cells were analyzed using a CytoFLEX (Beckman Coulter) with CytExpert 2.0 software and Prism 9.0 software (GraphPad). The iron uptake was inversely correlated with CellTrace calcein red-orange AM staining.

**Ca<sup>2+</sup> handling properties.** We examined Ca<sup>2+</sup> handling properties using Vala Sciences KIC Imager. Briefly, hiPSC-CMs were dissociated at day 30 of differentiation, plated at 75,000 in 96-well plates, and left for one week to recover. On the day of the experiment, cells were incubated with 1 mM of Cal-520 AM Ca<sup>2+</sup> reporter (AAT Bioquest, 21130) and DAPI for nucleus staining for 1 hr., the reporter was then washed, and cells were imaged. Data was analyzed using CyteSeer Analysis software (Vala Sciences). Ca<sup>2+</sup> transients were analyzed as the average of all Ca<sup>2+</sup> transients collected from all single cells within each well. We quantified Ca<sup>2+</sup> full width at half maximum (msec), calcium transient duration at 75% (msec) and decay time (msec).

**Impedance measurements.** hiPSC-CMs were dissociated using Liberase TH as described in cardiac differentiation section. 65,000 cells were plated in 96-well MEA plates (CardioExcyte



96, Nanion). A week after dissociation, impedance was measured at 37 °C in a 5% CO<sub>2</sub> environment. Data acquisition was performed using AxIS Navigator software (Axion Biosystem). Data analysis was achieved using the built-in functions in the Cardiac Analysis Tool (Axion Biosystem) and presented as beat rate (beat/min), Pulse width 50% (sec), upstroke velocity (ohm/sec) and relaxation velocity (ohm/sec).

**Statistical methods.** Data were presented as mean ± standard error of mean (SEM). Comparisons among more than groups were conducted using one- or two-way analysis of variance (ANOVA), and between two groups using an unpaired two-tailed Student's t-test or Mann-Whitney U test, depending in data distribution. The normal distribution was tested using GraphPad Prism 9. The *P*-values are adjusted based on the number of the multiple testing and significant differences defined as *P* < 0.05 (\*), *P* < 0.01 (\*\*), *P* < 0.001 (\*\*\*) and *P* < 0.0001 (\*\*\*\*).

## References

68. Aminkeng F, Ross CJD, Rassekh SR, et al. Pharmacogenomic screening for anthracycline-induced cardiotoxicity in childhood cancer. *Br J Clin Pharmacol*. May 2017;83(5):1143-1145. doi:10.1111/bcp.13218
69. Leong SL, Chaiyakunapruk N, Lee SW. Candidate Gene Association Studies of Anthracycline-induced Cardiotoxicity: A Systematic Review and Meta-analysis. *Sci Rep*. Feb 27 2017;7(1):39. doi:10.1038/s41598-017-00075-1
70. Linschoten M, Teske AJ, Cramer MJ, van der Wall E, Asselbergs FW. Chemotherapy-Related Cardiac Dysfunction: A Systematic Review of Genetic Variants Modulating Individual Risk. *Circ Genom Precis Med*. Jan 2018;11(1):e001753. doi:10.1161/CIRCGEN.117.001753

71. Pinheiro EA, Fetterman KA, Burridge PW. hiPSCs in cardio-oncology: deciphering the genomics. *Cardiovasc Res*. Apr 15 2019;115(5):935-948. doi:10.1093/cvr/cvz018
72. Morash M, Mitchell H, Yu A, et al. CATCH-KB: Establishing a Pharmacogenomics Variant Repository for Chemotherapy-Induced Cardiotoxicity. *AMIA Jt Summits Transl Sci Proc*. 2018;2017:168-177.
73. Magdy T, Jiang Z, Jouni M, et al. RARG variant predictive of doxorubicin-induced cardiotoxicity identifies a cardioprotective therapy. *Cell Stem Cell*. Dec 2 2021;28(12):2076-2089 e7. doi:10.1016/j.stem.2021.08.006
74. Kuo HH, Gao X, DeKeyser JM, et al. Negligible-Cost and Weekend-Free Chemically Defined Human iPSC Culture. *Stem Cell Reports*. Feb 11 2020;14(2):256-270. doi:10.1016/j.stemcr.2019.12.007
75. Fonoudi H, Lyra-Leite DM, Javed HA, Burridge PW. Generating a Cost-Effective, Weekend-Free Chemically Defined Human Induced Pluripotent Stem Cell (hiPSC) Culture Medium. *Curr Protoc Stem Cell Biol*. Jun 2020;53(1):e110. doi:10.1002/cpsc.110
76. Lyra-Leite DM, Fonoudi H, Gharib M, Burridge PW. An updated protocol for the cost-effective and weekend-free culture of human induced pluripotent stem cells. *STAR Protoc*. Mar 19 2021;2(1):100213. doi:10.1016/j.xpro.2020.100213
77. Burridge PW, Holmstrom A, Wu JC. Chemically Defined Culture and Cardiomyocyte Differentiation of Human Pluripotent Stem Cells. *Curr Protoc Hum Genet*. Oct 6 2015;87:21 3 1-21 3 15. doi:10.1002/0471142905.hg2103s87
78. Burridge PW, Matsa E, Shukla P, et al. Chemically defined generation of human cardiomyocytes. *Nat Methods*. Aug 2014;11(8):855-60. doi:10.1038/nmeth.2999

79. Schindelin J, Arganda-Carreras I, Frise E, et al. Fiji: an open-source platform for biological-image analysis. *Nat Methods*. Jun 28 2012;9(7):676-82. doi:10.1038/nmeth.2019

**Supplemental Table 1: Genes and variants associated with DIC. Provided as an .xlsx file**

**Supplemental Table 2: gRNAs sequences used for CRISPR/Cas9 directed knockout of AIC-related genes.**

| Gene             | Primer | Sequence                     |
|------------------|--------|------------------------------|
| <i>ABCC1-KO</i>  | P1-F   | 5'-TGGGCTGACCAGAAACACTG-3'   |
|                  | P1-R   | 5'-CAGTGTTTCTGGTCAGCCCAC-3'  |
|                  | P2-F   | 5'-ATCCACAGCAAAAATCCCA-3'    |
|                  | P2-R   | 5'-TGGGATTTTTGCTGTGGATC-3'   |
| <i>ABCB4-KO</i>  | P1-F   | 5'-GAAGTCGCCCTCCGCGCTCGT-3'  |
|                  | P1-R   | 5'-ACGAGCGCGGAGGGCGACTTC-3'  |
| <i>ABCC2-KO</i>  | P1-F   | 5'-GCACGTGGAGAAGCTGCCAG-3'   |
|                  | P1-R   | 5'-CCTGGCAGCTTCTCCACGTG-3'   |
|                  | P2-F   | 5'-CTCATTCCTGGACAGTCCG-3'    |
|                  | P2-R   | 5'-CCGACTGTCCAGGAATGAG-3'    |
| <i>ABCC5-KO</i>  | P1-F   | 5'-GAAGATGAAGGATATCGACAT-3'  |
|                  | P1-R   | 5'-ATGTCGATATCCTTCATCTTC-3'  |
|                  | P2-F   | 5'-GGGTCAGCTTGGGCGAGTTC-3'   |
|                  | P2-R   | 5'-GAACTCGCCCAAGCTGACCC-3'   |
| <i>ABCC9-KO</i>  | P1-F   | 5'-CCATGGGGGAGATGACTCTG-3'   |
|                  | P1-R   | 5'-CAGAGTCATCTCCCCATGGC-3'   |
| <i>ABCC10-KO</i> | P1-F   | 5'-CTTGTGACAGAGCTGCTGAG-3'   |
|                  | P1-R   | 5'-CTCAGCAGCTCTGTCAACAAGC-3' |
| <i>ABCC2-KO</i>  | P1-F   | 5'-CACGTGGAGAAGCTGCCAGG-3'   |
|                  | P1-R   | 5'-CCTGGCAGCTTCTCCACGTGC-3'  |
|                  | P2-F   | 5'-CTCATTCCTGGACAGTCCGG-3'   |
|                  | P2-R   | 5'-CCGACTGTCCAGGAATGAGC-3'   |
| <i>ATP2B1-KO</i> | P1-F   | 5'-AATTACGCTCGCAGAGCTG-3'    |
|                  | P1-R   | 5'-CAGCTCTGCGAGCGTAATTC-3'   |
|                  | P2-F   | 5'-AACAACTCAGTTGCTTACAG-3'   |
|                  | P2-R   | 5'-CTGTAAGCAACTGAGTTGTTC-3'  |
| <i>CAT-KO</i>    | P1-F   | 5'-GTCTGGTTCGCTGGCGGGATCC-3' |
|                  | P1-R   | 5'-GGATCCCGCCAGCGACCAGAC-3'  |
| <i>CBRI-KO</i>   | P1-F   | 5'-CCGTA CTCTTGCGCAGGAAC-3'  |
|                  | P1-R   | 5'-CCTGGCAGCTTCTCCACGTGC-3'  |
|                  | P2-F   | 5'-TACAGCAGCTGCAGGCGGA-3'    |
|                  | P2-R   | 5'-TCCGCCTGCAGCTGCTGTAC-3'   |
| <i>CBR3-KO</i>   | P1-F   | 5'-CAACGTACTGGTCAACAACG-3'   |
|                  | P1-R   | 5'-CGTTGTTGACCAGTACGTTGC-3'  |
|                  | P2-F   | 5'-AGTCGTCGATGTCCAGTTGG-3'   |
|                  | P2-R   | 5'-CCA ACTGGACATCGACGACTC-3' |
| <i>CELF4-KO</i>  | P1-F   | 5'-GGCCACGTTAGCAAACGGAC-3'   |
|                  | P1-R   | 5'-GTCCGTTTGCTAACGTGGCC-3'   |
| <i>CYBA-KO</i>   | P1-F   | 5'-TAGGCACCAAAGTACCACT-3'    |
|                  | P1-R   | 5'-AGTGGTACTTTGGTGCCTAC-3'   |
| <i>COL1A2-KO</i> | P1-F   | 5'-TGCTCAGCTTTGTGGATACG-3'   |
|                  | P1-R   | 5'-CGTATCCACAAAGCTGAGCAC-3'  |
| <i>CYP2J2-KO</i> | P1-F   | 5'-CCCAAAGAACTACCCGCCG-3'    |
|                  | P1-R   | 5'-CGGCGGGTAGTTCTTTGGGC-3'   |
|                  | P2-F   | 5'-AGGATGGACCACTGCCAG-3'     |
|                  | P2-R   | 5'-CTGGGCAGTGGTCCATCCTC-3'   |

|                    |      |                              |
|--------------------|------|------------------------------|
| <i>ERBB2-KO</i>    | P1-F | 5'-CTGGCATTGGTGGGCAGGT-3'    |
|                    | P1-R | 5'-ACCTGCCACCAATGCCAGC-3'    |
|                    | P2-F | 5'-CCGGCACAGACATGAAGCTG-3'   |
|                    | P2-R | 5'-CAGCTTCATGTCTGTGCCGGC-3'  |
| <i>ERCC2-KO</i>    | P1-F | 5'-GCGGGAGCTCAAACGCACGC-3'   |
|                    | P1-R | 5'-GCGTGCGTTTGAGCTCCCGC-3'   |
| <i>GSTP1-KO</i>    | P1-F | 5'-GGGAAATAGACCACGGTGTA-3'   |
|                    | P1-R | 5'-TACACCGTGGTCTATTTCCC-3'   |
| <i>GPX3-KO</i>     | P1-F | 5'-CAGGAGCAGGGAAAGCAGGC-3'   |
|                    | P1-R | 5'-GCCTGCTTTCCCTGCTCCTGC-3'  |
| <i>GSTM1-KO</i>    | P1-F | 5'-GCGGGAGCTCAAACGCACGC-3'   |
|                    | P1-R | 5'-CCATCGTGTACTTCTTTTCC-3'   |
| <i>HAS3-KO</i>     | P1-F | 5'-GAACTGGTAGCCCGTCACAT-3'   |
|                    | P1-R | 5'-ATGTGACGGGCTACCAGTTC-3'   |
| <i>HFE-KO</i>      | P1-F | 5'-GCCGCGGTCTGCAAAGCATC-3'   |
|                    | P1-R | 5'-GATGCTTTTGAGACCCGCGGC-3'  |
| <i>HNMT-KO</i>     | P1-F | 5'-GCTGCATGCACTGGTGTTCGG-3'  |
|                    | P1-R | 5'-CGGAACACCAGTGCATGCAGC-3'  |
| <i>MLH1-KO</i>     | P1-F | 5'-TGACTGCAGCTTGTACCCCC-3'   |
|                    | P1-R | 5'-GGGGGTACAAGCTGCAGTCAC-3'  |
| <i>MYH7-KO</i>     | P1-F | 5'-GTTCTCTGACTTGCGCAGGTA-3'  |
|                    | P1-R | 5'-TACCTGCGCAAGTCAGAGAAC-3'  |
| <i>NOS3-KO</i>     | P1-F | 5'-GCCTTGGGCTGTGCGGCAAGC-3'  |
|                    | P1-R | 5'-GCTTGCCGCACAGCCCAAGGC-3'  |
| <i>POR-KO</i>      | P1-F | 5'-GTACTTCTTCGGCCACCGCCT-3'  |
|                    | P1-R | 5'-AGGCGGTGGCCGAAGAAGTAC-3'  |
| <i>PRDM2-KO</i>    | P1-F | 5'-GTACCCGAACATGTGCTGCG-3'   |
|                    | P1-R | 5'-CGCAGCACATGTTCCGGTAC-3'   |
|                    | P2-F | 5'-GCCGCTTCTAATCGCTCGTC-3'   |
|                    | P2-R | 5'-GACGAGCGATTAGAAGCGGC-3'   |
| <i>PLCE1-KO</i>    | P1-F | 5'-GTTTCAGCATCATTTCGTCCAG-3' |
|                    | P1-R | 5'-TGGACGAATGATGCTGAAAC-3'   |
|                    | P2-F | 5'-AGTATCGCGCCACCCTCCAA-3'   |
|                    | P2-R | 5'-TTGGAGGGTGGCGGATACT-3'    |
| <i>RAC2-KO</i>     | P1-F | 5'-GCTCTCCGGGAAAGGCGTTGG-3'  |
|                    | P1-R | 5'-CCAACGCCTTTCCCGGAGAGC-3'  |
| <i>RARG-KO</i>     | P1-F | 5'-GACTTTTGGAGGCCAGTGG-3'    |
|                    | P1-R | 5'-GAGGCCATCTCCTTGGGGA-3'    |
| <i>RIN3-KO</i>     | P1-F | 5'-AATGGTGTATTTCGAGCACCT-3'  |
|                    | P1-R | 5'-AGGTGCTCGAATACACCATT-3'   |
| <i>SLC22A17-KO</i> | P1-F | 5'-GCCCGTAGTGGCAATGCAGCG-3'  |
|                    | P1-R | 5'-CGCTGCATTGCCACTACGGGC-3'  |
|                    | P2-F | 5'-GCTGAGCGAAACCGGCCCAT-3'   |
|                    | P2-R | 5'-ATGGGGCCGGTTTCGCTCAGC-3'  |
| <i>SLC28A1-KO</i>  | P1-F | 5'-ATGGACTCTTCTCGTCTCGA-3'   |
|                    | P1-R | 5'-TCGAGACGAAGAGAGTCCATC-3'  |
| <i>SLC28A3-KO</i>  | P1-F | 5'-GCTGAGGGCTACAGCAACGT-3'   |
|                    | P1-R | 5'-ACGTTGCTGTAGCCCTCAGC-3'   |
| <i>SP4-KO</i>      | P1-F | 5'-TAATGGAATGCAGAATGCAC-3'   |
|                    | P1-R | 5'-GTGCATTCTGCATTCCATTAC-3'  |
| <i>SPG7-KO</i>     | P1-F | 5'-GCCGGTCTTCGGCCGCTGTG-3'   |
|                    | P1-R | 5'-CACAGCGGCCGAGGACCCGGC-3'  |

|                  |      |                             |
|------------------|------|-----------------------------|
| <i>WDR4-KO</i>   | P1-F | 5'-GTCGGCAGTGAGGATGAAG-3'   |
|                  | P1-R | 5'-CTTCATCCTCACTGCCGACC-3'  |
| <i>ZNF521-KO</i> | P1-F | 5'-CGAGGGACCAGTCATGTCAG-3'  |
|                  | P1-R | 5'-CTGACATGACTGGTCCCTCGC-3' |

**Supplemental Table 3: Potential off targets of each gRNA used for CRISPR/Cas9 directed knockout of AIC-related genes. Provided as an .xlsx file**

**Supplemental Table 4: Confirmation of the knockout clones in isogenic hiPSC using Sanger sequencing. The codon and protein changes introduced by CRISPR/Cas9 at target loci.**

| Gene knockout line  | Codon changes                                                             | Protein changes                                                                                                                                                               |
|---------------------|---------------------------------------------------------------------------|-------------------------------------------------------------------------------------------------------------------------------------------------------------------------------|
| <i>RARG</i> -KO     | heterozygote, one allele insertion 1 bp (T), one allele deletion 8 bp     | allele with insertion 1 bp (T): frameshift premature stop codon, WT 443 aa, KO 39 aa<br>allele with deletion 8 bp: frameshift premature stop codon, WT 443 aa, KO 35 aa       |
| <i>PRDM2</i> -KO    | homozygote insertion 1 bp (T)                                             | frameshift premature stop codon, WT 1718 aa, KO 37 aa                                                                                                                         |
| <i>WDR4</i> -KO     | homozygote deletion 3 bp in frame (TTC)                                   | new protein of 411 aa instead of 412 aa, RNA expression decreased by 87%                                                                                                      |
| <i>ZNF521</i> -KO   | homozygote insertion 1 bp (A)                                             | frameshift premature stop codon, WT 1311 aa, KO 398 aa                                                                                                                        |
| <i>SP4</i> -KO      | homozygote insertion 52 bp                                                | frameshift premature stop codon, WT 784 aa, KO 573 aa                                                                                                                         |
| <i>RIN3</i> -KO     | heterozygote deletion 61 bp                                               | frameshift premature stop codon, WT 985 aa, KO 118 aa                                                                                                                         |
| <i>SLC28A3</i> -KO  | homozygote deletion 8 bp                                                  | frameshift premature stop codon, WT 691aa, KO 18aa                                                                                                                            |
| <i>ABCC9</i> -KO    | heterozygote insertion 1 bp (T)                                           | frameshift premature stop codon, WT 1549aa, KO 419 aa                                                                                                                         |
| <i>HNMT</i> -KO     | homozygote deletion 10 bp                                                 | frameshift premature stop codon, WT 292aa, KO 39a                                                                                                                             |
| <i>SLC22A17</i> -KO | homozygote insertion 1 bp (T)                                             | frameshift premature stop codon, WT 631 aa, KO 133 aa                                                                                                                         |
| <i>GPX3</i> -KO     | homozygote deletion 14 bp                                                 | frameshift premature stop codon, WT 226 aa, KO 11 aa                                                                                                                          |
| <i>SLC28A1</i> -KO  | heterozygote deletion 9 bp                                                | different amino acid sequence starting from aa 7                                                                                                                              |
| <i>MYH7</i> -KO     | heterozygote deletion 38 bp                                               | frameshift premature stop codon, WT 1935 aa, KO 18 aa                                                                                                                         |
| <i>CYP2J2</i> -KO   | homozygote deletion 94 bp                                                 | frameshift premature stop codon, WT 502 aa, KO 40 aa                                                                                                                          |
| <i>CBR3</i> -KO     | homozygote insertion 27 bp                                                | no protein due to removal of ATG                                                                                                                                              |
| <i>COL1A2</i> -KO   | heterozygote, one allele insertion 1 bp (T), one allele deletion 8 bp     | allele with insertion 1 bp (T): frameshift premature stop codon, WT 1366 aa, KO 37 aa<br>allele with deletion 8 bp: frameshift premature stop codon, WT 1366 aa, KO 34 aa     |
| <i>SPG7</i> -KO     | homozygote insertion 1 bp (T)                                             | frameshift premature stop codon, WT 794 aa, KO 72 aa                                                                                                                          |
| <i>HFE</i> -KO      | homozygote deletion 18 bp                                                 | loss of 6 aa                                                                                                                                                                  |
| <i>ABCC10</i> -KO   | heterozygote, one allele deletion 1 bp (C), one allele insertion 1 bp (T) | allele with deletion 1bp (C): frameshift premature stop codon, WT 1492 aa, KO 465 aa<br>allele with 1bp insertion (T): frameshift premature stop codon, WT 1492 aa, KO 690 aa |
| <i>ABCB4</i> -KO    | heterozygote, one allele insertion 1 bp (A), one allele deletion 18 bp    | allele with insertion 1 bp (A): frameshift premature stop codon, WT 1279 aa, KO 21 aa<br>allele with deletion 18 bp: a shorter protein, WT 1279 aa, KO 1273 aa                |
| <i>GSTP1</i> -KO    | heterozygote, one allele deletion 1bp (C), one allele insertion 1bp (A)   | allele with deletion 1 bp (C): frameshift premature stop codon, WT 210 aa, KO 33 aa<br>allele with insertion 1bp (A): frameshift premature stop codon, WT 210 aa, KO 99 aa    |
| <i>PLCE1</i> -KO    | homozygote deletion 104 bp                                                | frameshift premature stop codon, WT 2302 aa, KO 459 aa                                                                                                                        |

|                   |                                                                    |                                                                                                                                                              |
|-------------------|--------------------------------------------------------------------|--------------------------------------------------------------------------------------------------------------------------------------------------------------|
| <i>GSTM1</i> -KO  | homozygote insertion 1 bp (A)                                      | frameshift premature stop codon, WT 218 aa, KO 39 aa                                                                                                         |
| <i>CELF4</i> -KO  | homozygote deletion 8 bp                                           | frameshift premature stop codon, WT 486 aa, KO 10 aa                                                                                                         |
| <i>CYBA</i> -KO   | homozygote deletion 1 bp (G)                                       | frameshift premature stop codon, WT 195 aa, KO 72 aa                                                                                                         |
| <i>HAS3</i> -KO   | homozygote deletion 1 bp (C)                                       | frameshift premature stop codon, WT 553 aa, KO 76 aa                                                                                                         |
| <i>MLH1</i> -KO   | homozygote deletion 22 bp                                          | frameshift premature stop codon, WT 756 aa, KO 499 aa                                                                                                        |
| <i>POR</i> -KO    | homozygote deletion 1bp (C)                                        | frameshift premature stop codon, WT 677 aa, KO 24 aa                                                                                                         |
| <i>RAC2</i> -KO   | homozygote 1 bp deletion (A)                                       | frameshift premature stop codon, WT 192 aa, KO 43 aa                                                                                                         |
| <i>CAT</i> -KO    | heterozygote deletion 12 bp plus 1 bp insertion                    | frameshift premature stop codon, WT 527 aa, KO 20 aa                                                                                                         |
| <i>NOS3</i> -KO   | homozygote insertion 1 bp (A)                                      | frameshift premature stop codon, WT 1203 aa, KO 36 aa                                                                                                        |
| <i>ABCC2</i> -KO  | heterozygote, one allele deletion 89 bp, one allele deletion 81 bp | allele with deletion 89 bp: frameshift premature stop codon, WT 1545 aa, KO 22 aa<br>allele with deletion 81 bp: a different protein, WT 1545 aa, KO 1518 aa |
| <i>ATP2B1</i> -KO | heterozygote deletion 67 bp                                        | frameshift premature stop codon, WT 1220 aa, KO 40 aa                                                                                                        |
| <i>CBR1</i> -KO   | homozygote deletion 86 bp                                          | frameshift premature stop codon, WT 277 aa, KO 69 aa                                                                                                         |
| <i>ERBB2</i> -KO  | homozygote deletion 97 bp                                          | frameshift premature stop codon, WT 1255 aa, KO 58 aa                                                                                                        |



**Supplemental Table 5: Sequencing primers used to verify knockouts of AIC-related genes in hiPSCs.**

| Gene              | Primer | Sequence                      |
|-------------------|--------|-------------------------------|
| <i>ABCC1</i> -KO  | P1-F   | 5'-GGGCGGTCTGTTGTAGGATA-3'    |
|                   | P1-R   | 5'-GGTCACAGCCAGCTCCTACT-3'    |
|                   | P2-F   | 5'-ATCCACAGCAAAAATCCCA-3'     |
|                   | P2-R   | 5'-TGGGATTTTTGCTGTGGATC-3'    |
| <i>ABCB4</i> -KO  | P1-F   | 5'-CGAGGTTCGAGGTGAGAGAG-3'    |
|                   | P1-R   | 5'-CCAAAAGGAGCCTCAGTGAC-3'    |
| <i>ABCC2</i> -KO  | P1-F   | 5'-GTTTTTGGAGGGTGGGTTG-3'     |
|                   | P1-R   | 5'-ACCTGGGACAGCTGCTTAAA-3'    |
| <i>ABCC5</i> -KO  | P1-F   | 5'-TCCCTTAGAGTTGGGAGAAGG-3'   |
|                   | P1-R   | 5'-CTCCCAAAGTGCTGGGTTTA-3'    |
| <i>ABCC9</i> -KO  | P1-F   | 5'-TGGCTGATTTAAGAAGATGATCC-3' |
|                   | P1-R   | 5'-GACGGGGTAGGGCAGATATT-3'    |
| <i>ABCC10</i> -KO | P1-F   | 5'-AGGATTTGAAGGGCAGGATT-3'    |
|                   | P1-R   | 5'-GATCCCTCCCTCCTTCTCAG-3'    |
| <i>ABCC2</i> -KO  | P1-F   | 5'-TGTGTGAAAGCAGTGGGATG-3'    |
|                   | P1-R   | 5'-TCCACACCAGAACAGTTTGC-3'    |
|                   | P2-F   | 5'-GCAAACACTGTTCTGGTGTGGA-3'  |
|                   | P2-R   | 5'-TGTCTCTACTGTGCACCAAGG-3'   |
| <i>ATP2B1</i> -KO | P1-F   | 5'-AAATGTTGCTGCTGATGCTG-3'    |
|                   | P1-R   | 5'-TCATCCCGCCAATCTAAAAC-3'    |
| <i>CAT</i> -KO    | P1-F   | 5'-TGGGTATCTCCGGTCTTCAG-3'    |
|                   | P1-R   | 5'-CAGTTGGCAAAAGTGCAAAA-3'    |
| <i>CBR1</i> -KO   | P1-F   | 5'-CTGAGCCAGGTCTGTTCTCC-3'    |
|                   | P1-R   | 5'-CAGCCAGGGAAACACAAAGT-3'    |
| <i>CBR3</i> -KO   | P1-F   | 5'-TTGACACTAGCTGGGCTCCT-3'    |
|                   | P1-R   | 5'-GTTTTCTGCACACAACAGC-3'     |
| <i>CELF4</i> -KO  | P1-F   | 5'-CGGAGAGCGAGGTGTAGAGA-3'    |
|                   | P1-R   | 5'-GGCTTCCTCTCGCTTAGTCC-3'    |
| <i>CYBA</i> -KO   | P1-F   | 5'-ACAGTGCCTGACCCACTTCT-3'    |
|                   | P1-R   | 5'-GGAGGCAAACAGCTCACTG-3'     |
| <i>COL1A2</i> -KO | P1-F   | 5'-GAGGTTTCGGCTAAGTTGGA-3'    |
|                   | P1-R   | 5'-TGACTTCCTCCACCACATTG-3'    |
| <i>CYP2J2</i> -KO | P1-F   | 5'-CTCCTAGCCTGGCCTTTTCT-3'    |
|                   | P1-R   | 5'-CAGCGTTAGCCACACCTCTT-3'    |
| <i>ERBB2</i> -KO  | P1-F   | 5'-GCACAGGGTGGGCTAGTCAGA-3'   |
|                   | P1-R   | 5'-TGACCTCGGCCAGCCACGTTAT-3'  |
| <i>ERCC2</i> -KO  | P1-F   | 5'-CTGAGGGGACGGGAACTGA-3'     |
|                   | P1-R   | 5'-CCAGACGTCCTGCAATCTGT-3'    |
| <i>GSTP1</i> -KO  | P1-F   | 5'-TTCGCCACCAGTGAGTACG-3'     |
|                   | P1-R   | 5'-CACACGACGGAGGGATAAGG-3'    |

|                     |      |                                |
|---------------------|------|--------------------------------|
| <i>GPX3</i> -KO     | P1-F | 5'- CAGGCGACCCTGAGTGTG-3'      |
|                     | P1-R | 5'- TTCTTCAGGACCAGGACCAC-3'    |
| <i>GSTM1</i> -KO    | P1-F | 5'- TAGGGACCGTTTCTTCTCAG-3'    |
|                     | P1-R | 5'-CAGGGTTCAGGGACAAAGAA-3'     |
| <i>HAS3</i> -KO     | P1-F | 5'- ACCCTTCATCTCCTGCCTTC-3'    |
|                     | P1-R | 5'- ATGATGCACGAGAAGGTGCT-3'    |
| <i>HFE</i> -KO      | P1-F | 5'-TTACTGGGCATCTCCTGAGC-3'     |
|                     | P1-R | 5'-AACTGCACAGCTGACATTGG-3'     |
| <i>HNMT</i> -KO     | P1-F | 5'-TGGCTTTGCTGACAAAACAG-3'     |
|                     | P1-R | 5'-GCTGAGCGAGACCCATCTAT-3'     |
| <i>MLH1</i> -KO     | P1-F | 5'- AGTTGCTTGCTCCTCCAAAA-3'    |
|                     | P1-R | 5'- GAAAATTGGTGAAATGGCTGA-3'   |
| <i>MYH7</i> -KO     | P1-F | 5'- AGCATGGTGCTAGGTTTTGG-3'    |
|                     | P1-R | 5'- TGGTGAGTGACAGGGCAATA-3'    |
| <i>NOS3</i> -KO     | P1-F | 5'- CCTCCACTGCTTTTCAGAGG-3'    |
|                     | P1-R | 5'- CCTGGTGGCTCTGTCTTCTC-3'    |
| <i>POR</i> -KO      | P1-F | 5'-CCTCTGCTGACATCTGCTGT-3'     |
|                     | P1-R | 5'-CTGAGAGGCGGCACTTACAA-3'     |
| <i>PRDM2</i> -KO    | P1-F | 5'- CCAGCTTCAGTTTTCGGTTA-3'    |
|                     | P1-R | 5'- GAGGAGGACACTCAGGCAAG-3'    |
|                     | P2-F | 5'- GGTACGTGGCTGGTACCCTA-3'    |
|                     | P2-R | 5'- TGGCTTCTCATCACACCGTA-3'    |
| <i>PLCE1</i> -KO    | P1-F | 5'- GAGTGTTTGCACTTGGAGCA-3'    |
|                     | P1-R | 5'- GGGGATTTTAATAAGGGACCA-3'   |
| <i>RAC2</i> -KO     | P1-F | 5'- TGGACCCTGAAGTCTCCACT-3'    |
|                     | P1-R | 5'- CTACCCCTTCTCCATACCC-3'     |
| <i>RARG</i> -KO     | P1-F | 5'- GCAGCACAGAGGGAGAAGAC-3'    |
|                     | P1-R | 5'- TGGGGTGCCAACCTTTTTAC-3'    |
| <i>RIN3</i> -KO     | P1-F | 5'- GGGCAAATGAGAAACTGAGC-3'    |
|                     | P1-R | 5'- CTTCAATGTGGCCATGAGAA-3'    |
| <i>SLC22A17</i> -KO | P1-F | 5'- CCTGACTGCCTTCCCTAGCC-3'    |
|                     | P1-R | 5'- GGATGTGAGAAGGGTGCAG-3'     |
| <i>SLC28A1</i> -KO  | P1-F | 5'-GGCCTCCCTTTCAGCGTT-3'       |
|                     | P1-R | 5'-CAAAGAGGCTGAGGGGTCAG3'      |
| <i>SLC28A3</i> -KO  | P1-F | 5'-AAACTGAAGCAAGCTGTGCC-3'     |
|                     | P1-R | 5'- TTTGTCAACCCAGAAGAGCCC-3'   |
| <i>SP4</i> -KO      | P1-F | 5'ACTCAGGCTCAAGTTGTAACAACCC-3' |
|                     | P1-R | 5'AAAGGCTGCTGCTGGATGGTCT-3'    |
| <i>SPG7</i> -KO     | P1-F | 5'-ACGAGGTAGACGGGCTCAG-3'      |
|                     | P1-R | 5'-CAGACGGGTTGGGAAAGTC-3'      |
| <i>WDR4</i> -KO     | P1-F | 5'-AGCCTGCTCTAGCACTGAGG-3'     |
|                     | P1-R | 5'-AGAGTGAACCCACCCCTTC-3'      |
| <i>ZFN521</i> -KO   | P1-F | 5'- ATTCAAGAGGGCCCAACTCT-3'    |
|                     | P1-R | 5'- CAAGCACTGGAGACCCAAAT-3'    |

**Supplemental Table 6: Confirmation of the knockout clones in isogenic hiPSC using Western blotting.** The table contains the antibody used to detect each target protein, the host animal, dilution of the antibody and the cell type it was tested. Ms: Mouse, Rb: Rabbit, KO: Knockout.

| Gene knockout line  | Antibody                                       | Cell type                 |
|---------------------|------------------------------------------------|---------------------------|
| <i>RARG</i> -KO     | Origene, TA308949, Rb, 1:500                   | KO confirmed in hiPSCs    |
| <i>PRDM2</i> -KO    | Abcam, ab305105, Rb, 1:500                     | KO confirmed in hiPSCs    |
| <i>WDR4</i> -KO     | Abcam, ab169526, Rb, 1:500                     | KO confirmed in hiPSCs    |
| <i>ZNF521</i> -KO   | ThermoFisher Scientific, PA5-34388, Rb, 1:100  | KO confirmed in hiPSCs    |
| <i>SP4</i> -KO      | Abcam, ab151777, Rb, 1:500                     | KO confirmed in hiPSCs    |
| <i>RIN3</i> -KO     | Abcam, ab64838, Rb, 1:500                      | KO confirmed in hiPSCs    |
| <i>SLC28A3</i> -KO  | Santa Cruz Biotechnology, sc-134529, Rb, 1:100 | KO confirmed in hiPSC-CMs |
| <i>ABCC5</i> -KO    | Abcam, ab180724, Rb, 1:500                     | KO confirmed in hiPSCs    |
| <i>HNMT</i> -KO     | Santa Cruz Biotechnology, sc-374306, Ms, 1:500 | KO confirmed in hiPSCs    |
| <i>SLC22A17</i> -KO | Abcam, ab124506, RB, 1:500                     | KO confirmed in hiPSC-CMs |
| <i>SLC28A1</i> -KO  | Santa Cruz Biotechnology, sc-515874, Ms, 1:100 | KO confirmed in hiPSCs    |
| <i>MYH7</i> -KO     | Santa Cruz Biotechnology, sc-53090, Ms, 1:500  | KO confirmed in hiPSC-CMs |
| <i>CYP2J2</i> -KO   | Abcam, ab151996, Rb, 1:500                     | KO confirmed in hiPSC-CMs |
| <i>CBR3</i> -KO     | Santa Cruz Biotechnology, sc-374393, Ms, 1:100 | KO confirmed in hiPSCs    |
| <i>COL1A2</i> -KO   | Abcam, ab308455, Rb, 1:500                     | KO confirmed in hiPSCs    |
| <i>SPG7</i> -KO     | Abcam, ab305255, Rb, 1:500                     | KO confirmed in hiPSCs    |
| <i>HFE</i> -KO      | Abcam, ab133639, Rn, 1:500                     | KO confirmed in hiPSCs    |
| <i>ABCC10</i> -KO   | ThermoFisher Scientific, PA5-101678, Rb, 1:500 | KO confirmed in hiPSC-CMs |
| <i>GSTP1</i> -KO    | Abcam, ab138491, Rb, 1:500                     | KO confirmed in hiPSCs    |
| <i>PLCE1</i> -KO    | ThermoFisher Scientific, PA5-100856, Rb, 1:500 | KO confirmed in hiPSCs    |
| <i>GSTM1</i> -KO    | Santa Cruz Biotechnology, sc-517262, Ms, 1:100 | KO confirmed in hiPSCs    |
| <i>CELF4</i> -KO    | Abcam, ab171740, Rb, 1:500                     | KO confirmed in hiPSC-CMs |
| <i>CYBA</i> -KO     | Abcam, ab80896, Ms, 1:500                      | KO confirmed in hiPSCs    |
| <i>HAS3</i> -KO     | Abcam, ab170872, Rb, 1:500                     | KO confirmed in hiPSCs    |
| <i>MLH1</i> -KO     | Abcam, ab92312, Rb, 1:500                      | KO confirmed in hiPSCs    |
| <i>POR</i> -KO      | Santa Cruz Biotechnology, sc-25270, Ms, 1:500  | KO confirmed in hiPSCs    |
| <i>RAC2</i> -KO     | Abcam, ab191527, Rb, 1:500                     | KO confirmed in hiPSCs    |
| <i>CAT</i> -KO      | Cell Signaling Technology, 12980T, Rb, 1:100   | KO confirmed in hiPSCs    |
| <i>ABCC2</i> -KO    | Abcam, ab3373, Ms, 1:20                        | KO confirmed in hiPSCs    |
| <i>ATP2B1</i> -KO   | Abcam, ab190355, Rb, 1:500                     | KO confirmed in hiPSCs    |
| <i>CBR1</i> -KO     | Santa Cruz Bio., sc-390554, Ms, 1:100          | KO confirmed in hiPSCs    |
| <i>ERBB2</i> -KO    | ThermoFisher Scientific, ma5-13675, Ms, 1:500  | KO confirmed in hiPSCs    |

**Supplemental Table 7: List of proteins that western blot did not work on them.** The table contains the antibodies tested for each target protein, the host animal, and the dilution of the antibody. Ms: Mouse, Rb: Rabbit.

| <b>Protein</b> | <b>Antibody 1</b>                 | <b>Antibody 2</b>                             |
|----------------|-----------------------------------|-----------------------------------------------|
| ABCC9          | Abcam, ab174629, Ms, 1:100        | BD Biosciences, 550429, Ms, 1:500             |
| GPX3           | R&D Systems, AF4199, Goat, 1:500  | Abcam, ab275965, Rb, 1:500                    |
| ABCC4          | Abcam, ab191058, Rb, 1:500        | Santa Cruz Biotechnology, sc-58221, Ms, 1:500 |
| NOS3           | BD Biosciences, 610296, Ms, 1:100 | Abcam, ab199956, Rb, 1:100                    |

**Supplemental Table 8: TaqMan probes used to quantify the mRNA expression of AIC - related genes knockouts.**

| Gene            | Assay ID      |
|-----------------|---------------|
| <i>18S</i>      | Hs99999901 s1 |
| <i>ABCB4</i>    | Hs00983957 m1 |
| <i>ABCC10</i>   | Hs00375716 m1 |
| <i>ABCC2</i>    | Hs00166123 m1 |
| <i>ABCC5</i>    | Hs00981089 m1 |
| <i>ABCC9</i>    | Hs00245832 m1 |
| <i>ACTB</i>     | Hs01060665 g1 |
| <i>ATP2B1</i>   | Hs00155949 m1 |
| <i>CAT</i>      | Hs00156308 m1 |
| <i>CBR1</i>     | Hs00156323 m1 |
| <i>CBR3</i>     | Hs01025917 m1 |
| <i>CELF4</i>    | Hs00252384 m1 |
| <i>COL1A2</i>   | Hs01028970 m1 |
| <i>CYBA</i>     | Hs00609145 m1 |
| <i>CYP2J2</i>   | Hs00356035 m1 |
| <i>ERBB2</i>    | Hs01001580 m1 |
| <i>GAPDH</i>    | Hs02786624 g1 |
| <i>GPX3</i>     | Hs01078670 g1 |
| <i>GSTM1</i>    | Hs01683722 gH |
| <i>GSTP1</i>    | Hs00943350 g1 |
| <i>HAS3</i>     | Hs00193436 m1 |
| <i>HFE</i>      | Hs05045803 s1 |
| <i>HNMT</i>     | Hs02759756 s1 |
| <i>MLH1</i>     | Hs00979919 m1 |
| <i>MYH7</i>     | Hs01110632 m1 |
| <i>NOS3</i>     | Hs01574665 m1 |
| <i>PLCE1</i>    | Hs00275279 m1 |
| <i>POR</i>      | Hs01016332 m1 |
| <i>PRDM2</i>    | Hs00202013 m1 |
| <i>RAC2</i>     | Hs00427439 g1 |
| <i>RARG</i>     | Hs01559234    |
| <i>RIN3</i>     | Hs01112079 m1 |
| <i>SLC22A17</i> | Hs01033111 m1 |
| <i>SLC28A1</i>  | Hs00984391 m1 |
| <i>SLC28A3</i>  | Hs00910436 m1 |
| <i>SP4</i>      | Hs00162095 m1 |
| <i>SPG7</i>     | Hs00275795 m1 |
| <i>WDR4</i>     | Hs00902287 g1 |
| <i>ZFN521</i>   | Hs01031127 m1 |

**Supplemental Table 9: SNPs present in hiPSC line 19-3 that were significant in their original studies and are associated with genes in this study. Grey text indicates genes that were found not to influence in vitro DIC phenotype in this study.**

| CHROM | POS      | rsID       | REF | ALT | 19-3 | Variation               | Impact           | GENE           | MAF.gnomAD.genome.ALL | MAF.gnomAD.genome.NFE | MAF.1000 genome | CADD score | Clinvar |
|-------|----------|------------|-----|-----|------|-------------------------|------------------|----------------|-----------------------|-----------------------|-----------------|------------|---------|
| chr10 | 99781296 | rs1885301  | A   | G   | A/G  | upstream gene variant   |                  | <i>ABCC2</i>   | 0.5905                | 0.5816                | 0.619409        | .          | .       |
| chr21 | 36146408 | rs1056892  | G   | A   | G/A  | missense variant        | loss of function | <i>CBR3</i>    | 0.3836                | 0.3541                | 0.427117        | 17.19      | .       |
| chr7  | 94413927 | rs42524    | C   | G   | C/G  | missense variant        | loss of function | <i>COL1A2</i>  | 0.8092                | 0.7632                | 0.821685        | 16.99      | Benign  |
| chr16 | 88646828 | rs4673     | A   | G   | A/G  | missense variant        | loss of function | <i>CYBA</i>    | 0.6663                | 0.6728                | 0.664337        | 23.8       | Benign  |
| chr11 | 67585218 | rs1695     | A   | G   | A/G  | missense variant        | loss of function | <i>GSTP1</i>   | 0.3537                | 0.3351                | 0.352636        | 0.003      | Benign  |
| chr3  | 36993455 | rs1800734  | G   | A   | G/A  | 5 prime UTR variant     |                  | <i>MLH1</i>    | 0.2328                | 0.2231                | 0.320487        | .          | Benign  |
| chr7  | 75976791 | rs13240755 | G   | A   | G/A  | upstream gene variant   |                  | <i>POR</i>     | 0.5773                | 0.6704                | 0.492412        | .          | .       |
| chr7  | 75960585 | rs2868177  | A   | G   | A/G  | intron variant          |                  | <i>POR</i>     | 0.3527                | 0.3166                | 0.39996         | .          | .       |
| chr7  | 75978290 | rs4732513  | C   | T   | C/T  | upstream gene variant   |                  | <i>POR</i>     | 0.584                 | 0.6704                | 0.495208        | .          | .       |
| chr7  | 75971851 | rs6953065  | G   | A   | G/A  | intron variant          |                  | <i>POR</i>     | 0.3327                | 0.3914                | 0.28155         | .          | .       |
| chr22 | 37236730 | rs13058338 | T   | A   | T/A  | downstream gene variant |                  | <i>RAC2</i>    | 0.1957                | 0.2456                | 0.159944        | .          | .       |
| chr14 | 92663465 | rs9323880  | C   | T   | C/T  | intron variant          |                  | <i>RIN3</i>    | 0.3293                | 0.3652                | 0.295327        | .          | .       |
| chr9  | 84286011 | rs7853758  | G   | A   | G/A  | synonymous variant      |                  | <i>SLC28A3</i> | 0.1878                | 0.1488                | 0.202676        | .          | Benign  |
| chr9  | 84294635 | rs885004   | G   | A   | G/A  | downstream gene variant |                  | <i>SLC28A3</i> | 0.1185                | 0.1326                | 0.131989        | .          | .       |
| chr9  | 84331502 | rs4877847  | A   | C   | A/C  | intron variant          |                  | <i>SLC28A3</i> | 0.5046                | 0.5061                | 0.486022        | .          | .       |
| chr21 | 42853748 | rs15736    | G   | A   | G/A  | missense variant        | loss of function | <i>WDR4</i>    | 0.4392                | 0.3824                | 0.34345         | 19.54      | Benign  |
| chr18 | 25132827 | rs4381672  | A   | G   | A/G  | downstream gene variant |                  | <i>ZNF521</i>  | 0.6456                | 0.6358                | 0.637979        | .          | .       |
| chr18 | 25126724 | rs4275929  | C   | A   | C/A  | intron variant          |                  | <i>ZNF521</i>  | 0.658                 | 0.6357                | 0.652955        | .          | .       |

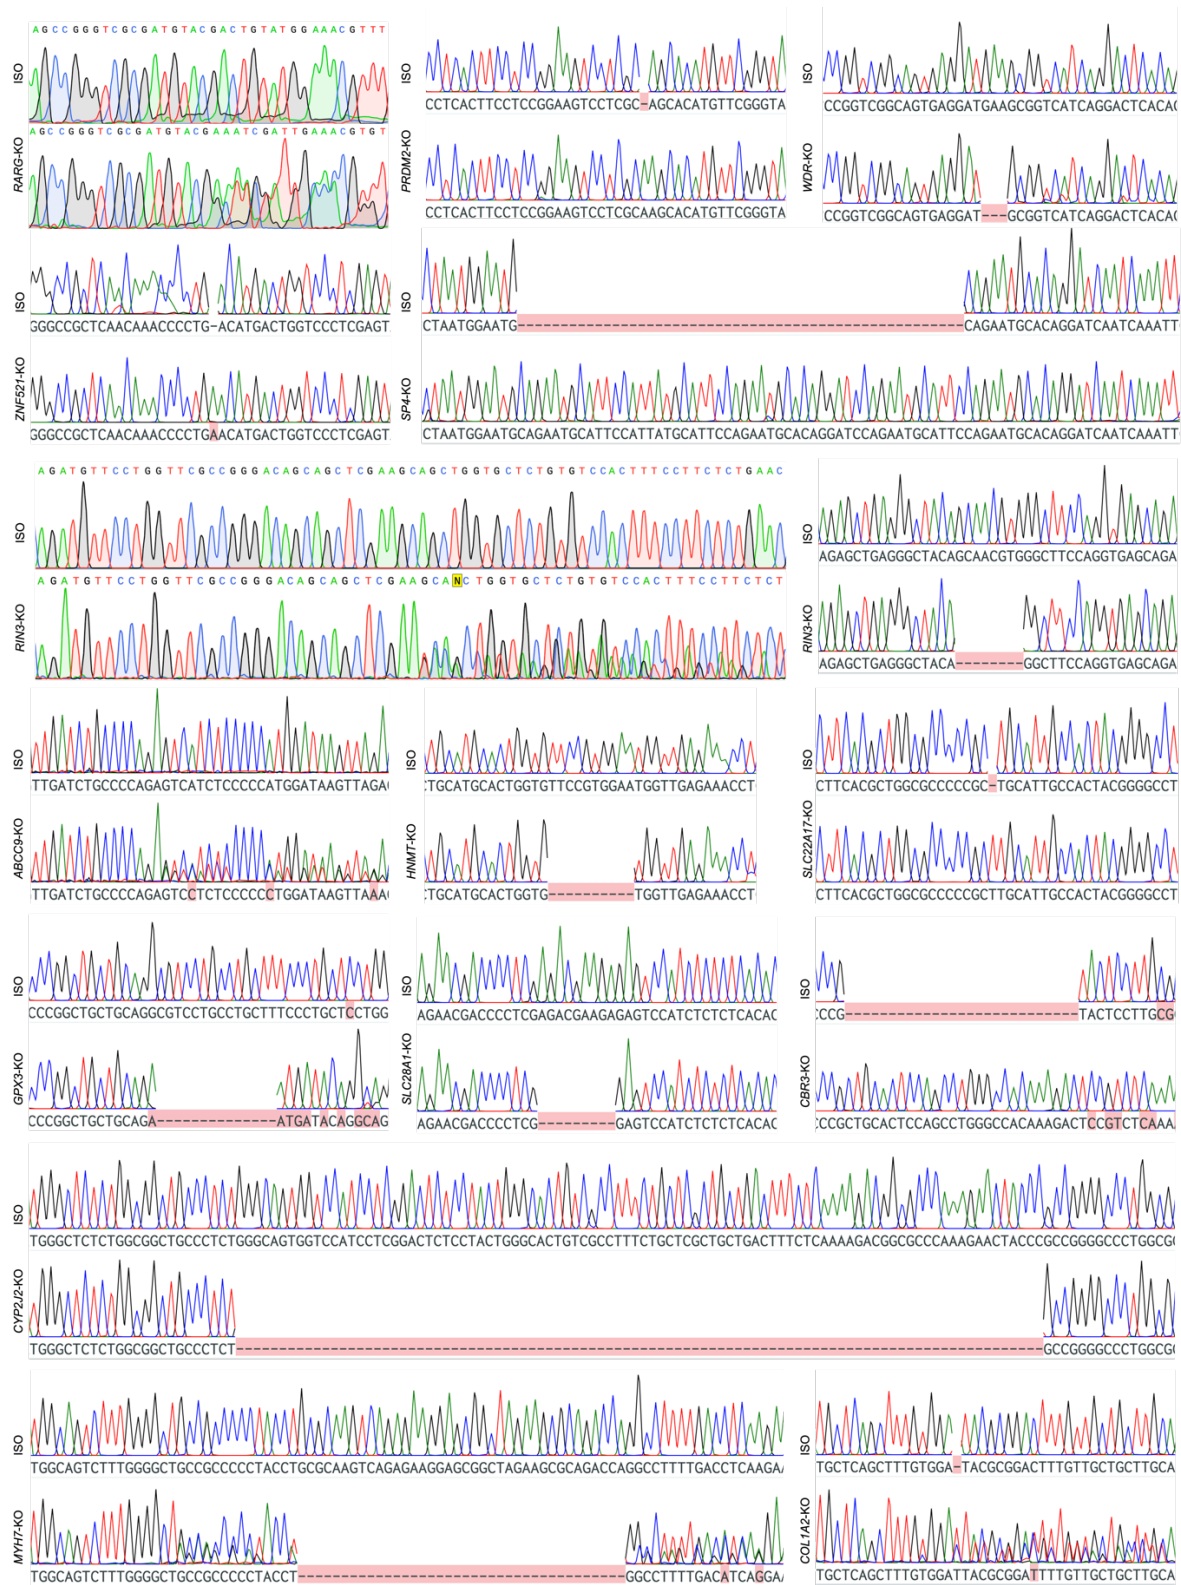

**Supplemental Figure 1. Sanger sequencing of knockout lines generated for each studied gene. ISO: Isogenic control.**

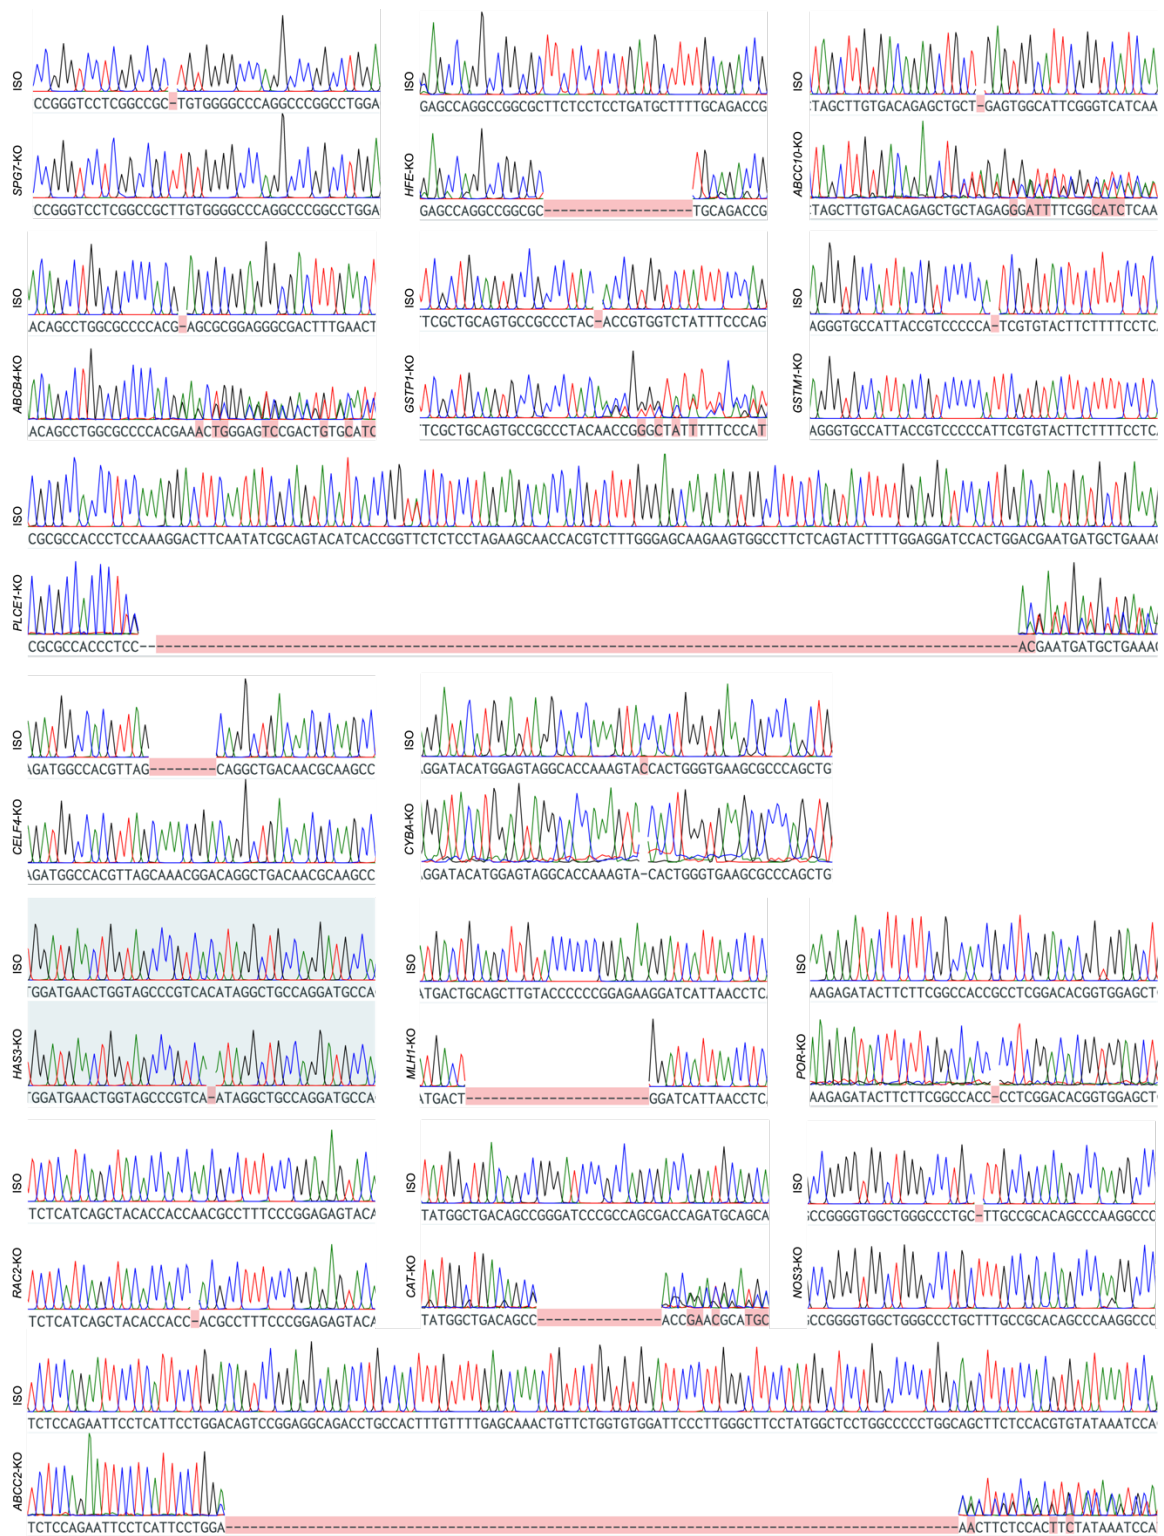

**Supplemental Figure 2. Sanger sequencing of knockout lines generated for each studied gene. ISO: Isogenic control.**



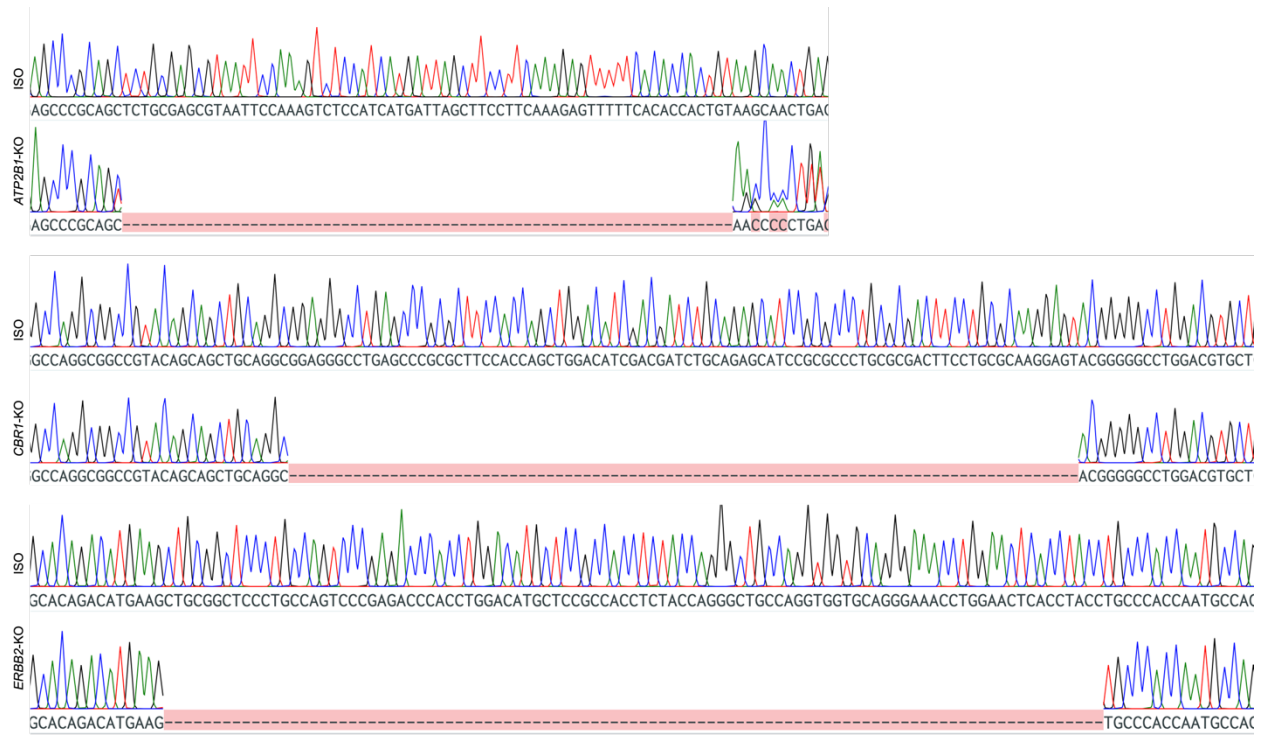

**Supplemental Figure 3. Sanger sequencing of knockout lines generated for each studied gene. ISO: Isogenic control.**

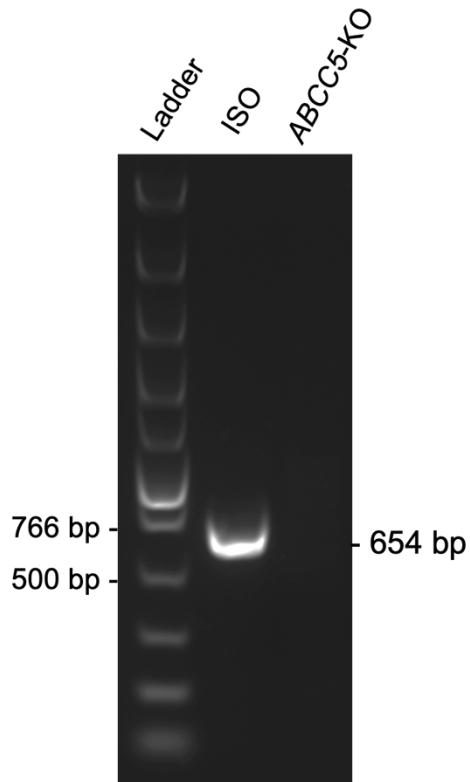

**Supplemental Figure 4. Gel electrophoresis of PCR product covering the region after the guide RNA of ABCC5. ISO: Isogenic control.**

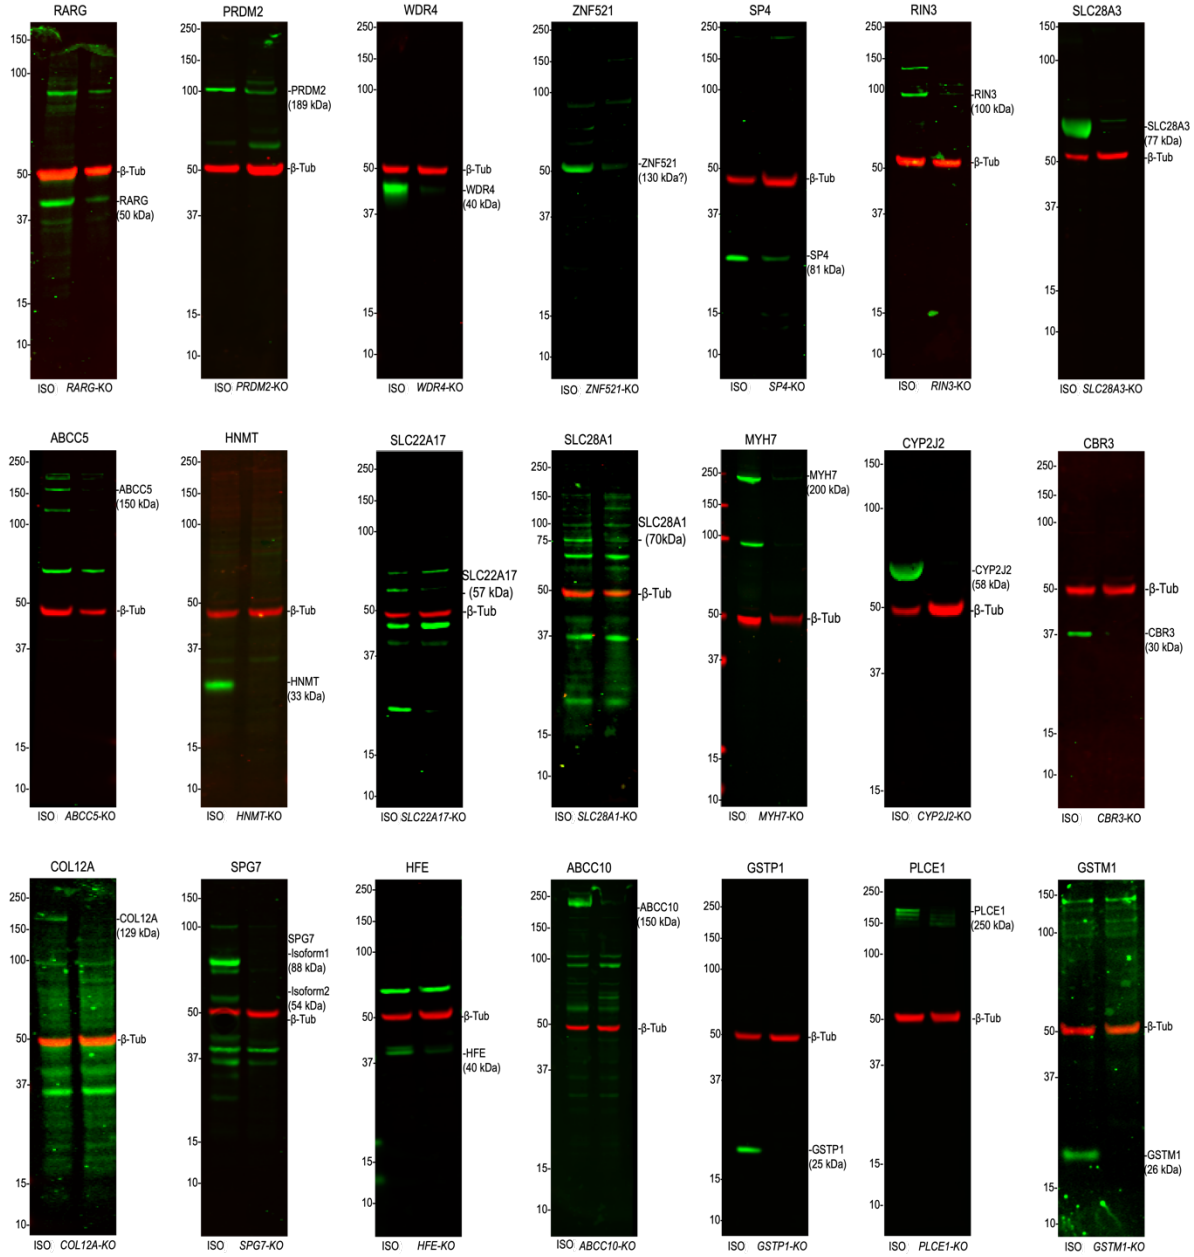

**Supplemental Figure 5. Western blot analysis of knock out lines generated for each studied gene. ISO: Isogenic control.  $\beta$ -Tub:  $\beta$ -Tubulin.**

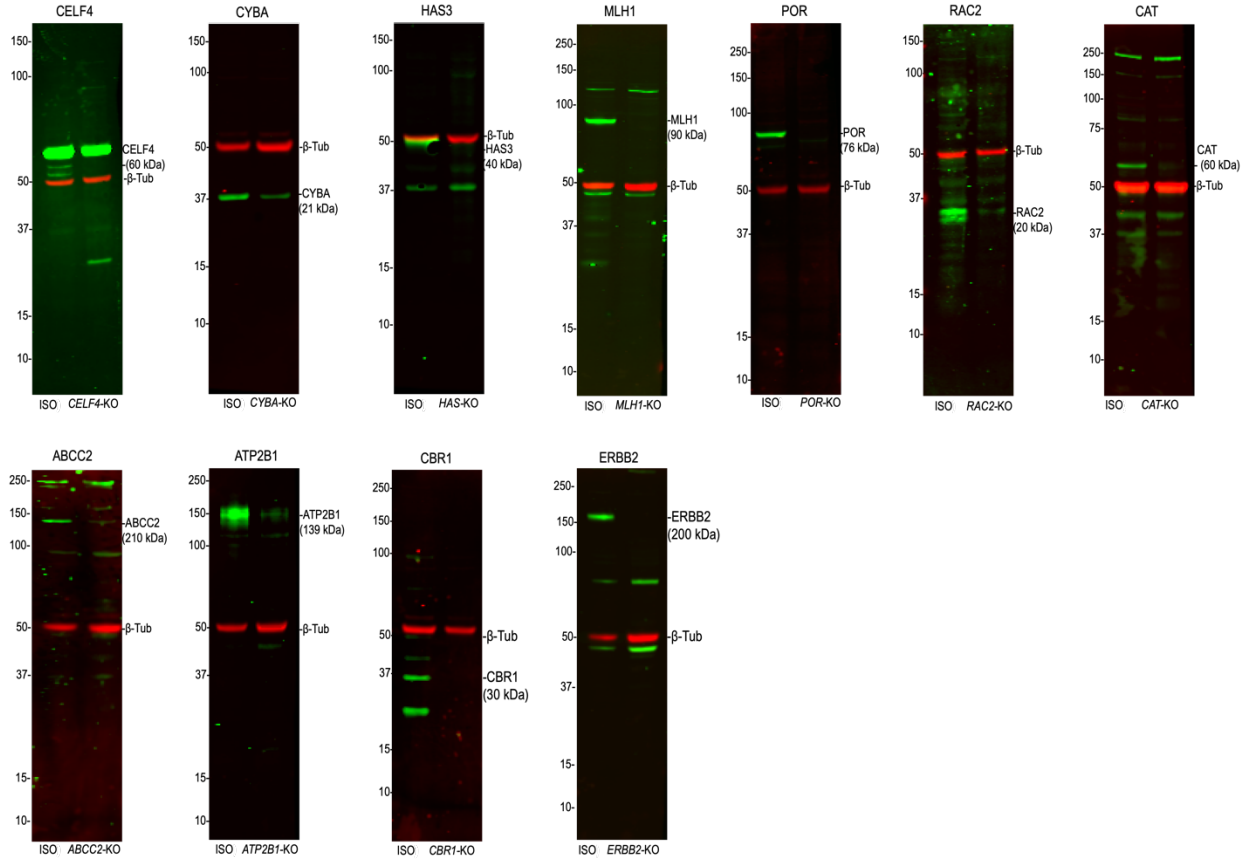

**Supplemental Figure 6. Western blot analysis of knock out lines generated for each studied gene. ISO: Isogenic control. β-Tub: β-Tubulin.**

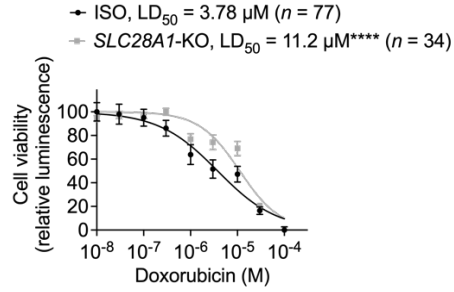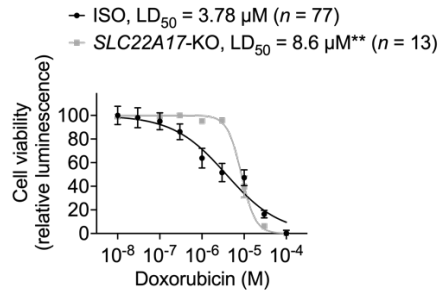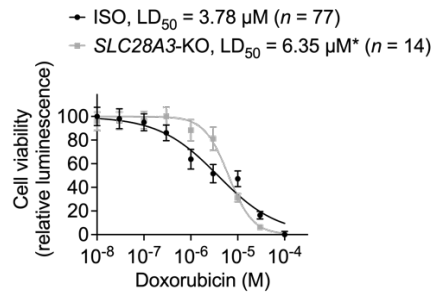

**Supplemental Figure 7. Cell viability analysis of different gene knockouts using CellTiter-Glo post 72 h of doxorubicin treatment.** ISO: Isogenic control, Error bars: SEM., \* $P < 0.05$ , \*\* $P \leq 0.01$ , \*\*\* $P < 0.001$ , \*\*\*\* $P < 0.0001$ .

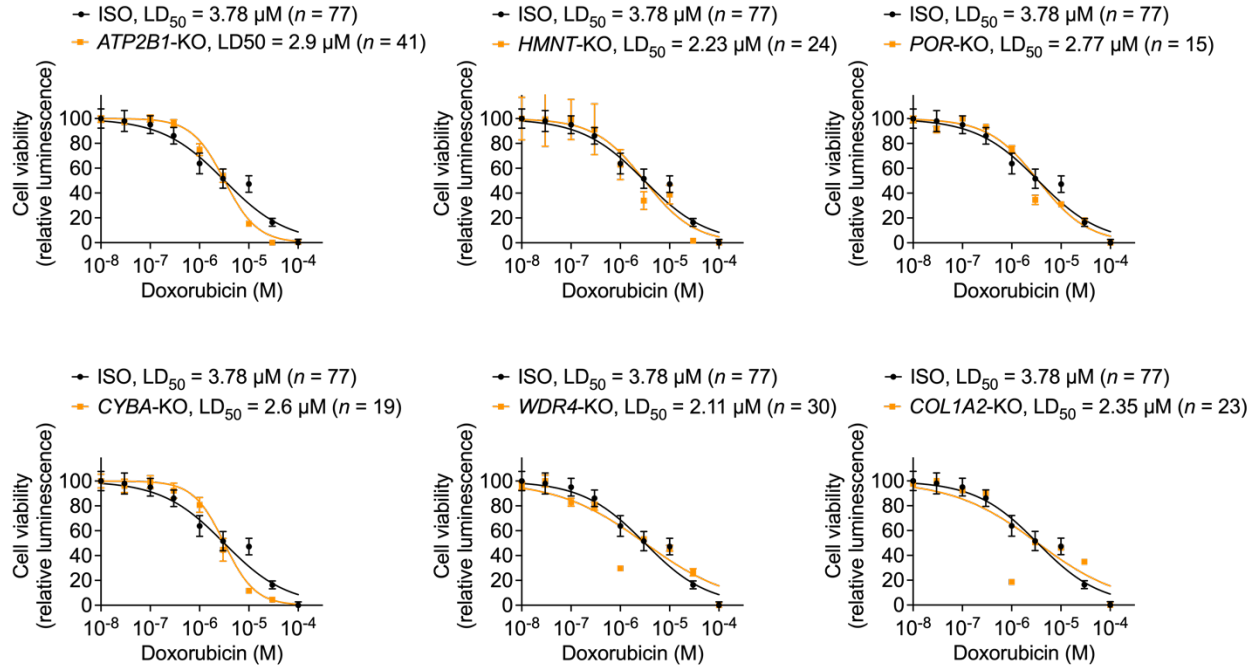

**Supplemental Figure 8. Cell viability analysis of different gene knockouts using CellTiter-Glo post 72 h of doxorubicin treatment.** ISO: Isogenic control, Error bars: SEM., \* $P < 0.05$ , \*\* $P \leq 0.01$ , \*\*\* $P < 0.001$ , \*\*\*\* $P < 0.0001$ .

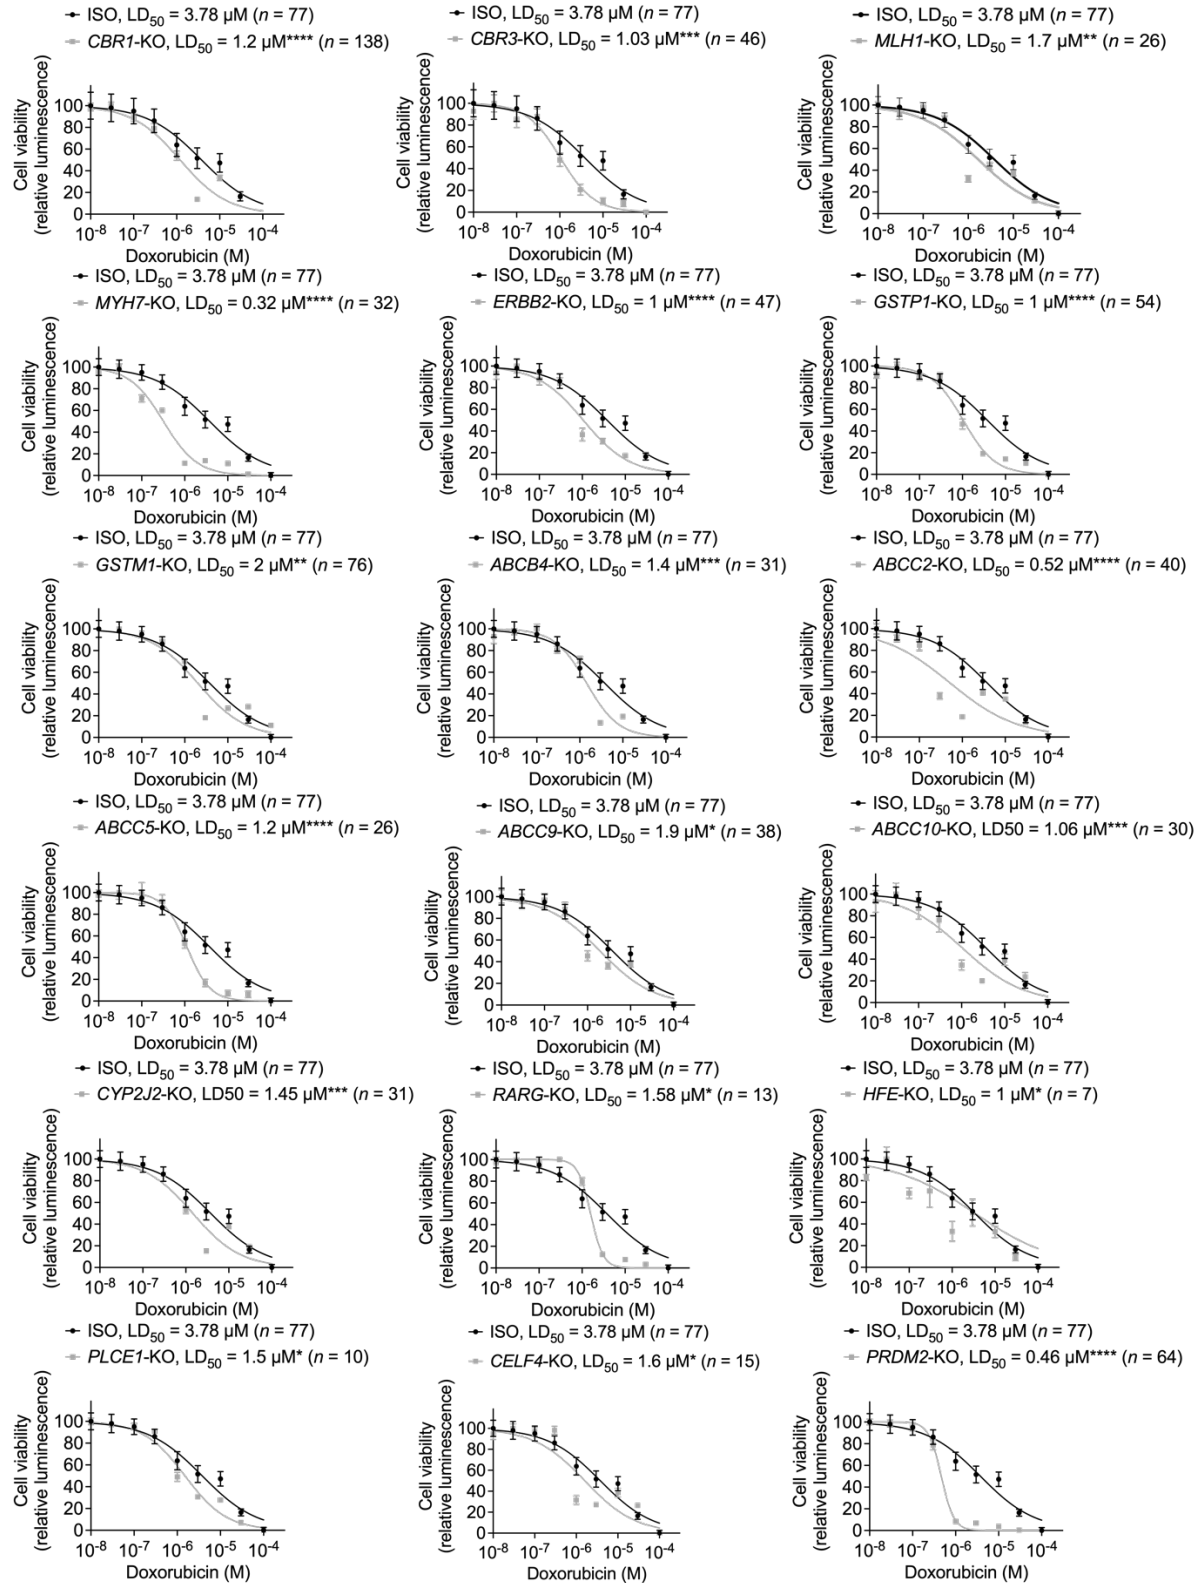

**Supplemental Figure 9. Cell viability analysis of different gene knockouts using CellTiter-Glo post 72 h of doxorubicin treatment.** ISO: Isogenic control, Error bars: SEM., \*P < 0.05, \*\*P ≤ 0.01, \*\*\*P < 0.001, \*\*\*\*P < 0.0001.

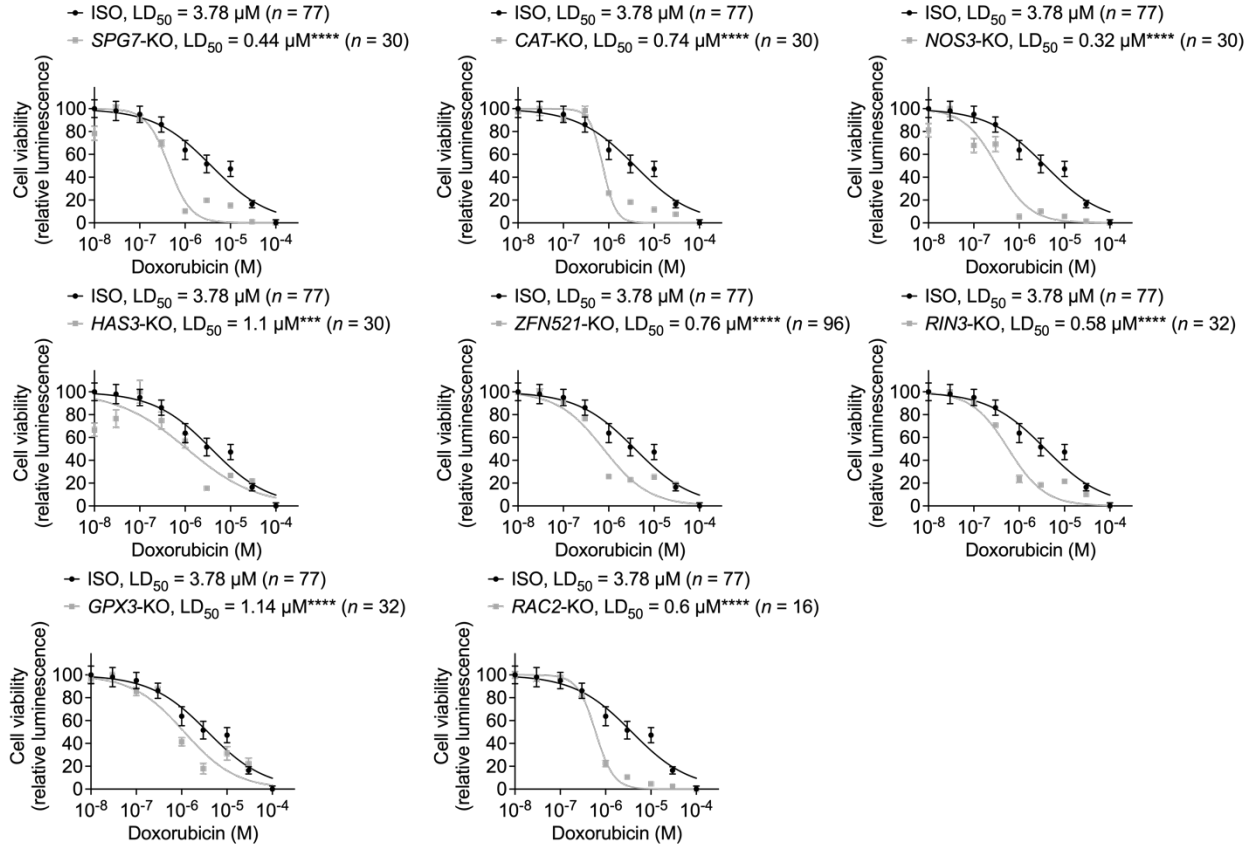

**Supplemental Figure 10. Cell viability analysis of different gene knockouts using CellTiter-Glo post 72 h of doxorubicin treatment.** ISO: Isogenic control, Error bars: SEM., \**P* < 0.05, \*\**P* ≤ 0.01, \*\*\**P* < 0.001, \*\*\*\**P* < 0.0001.
